# Supplementary material
Source: MDPI journal article supplement (https://www.mdpi.com/2227-9717/8/11/1522)
Supplement: s1 [file s1]

Supporting Information for theoretical evaluation of the melting efficiency for the  
single-screw micro-extrusion process: the case of 3D printing of ABS

Standard Extruder II

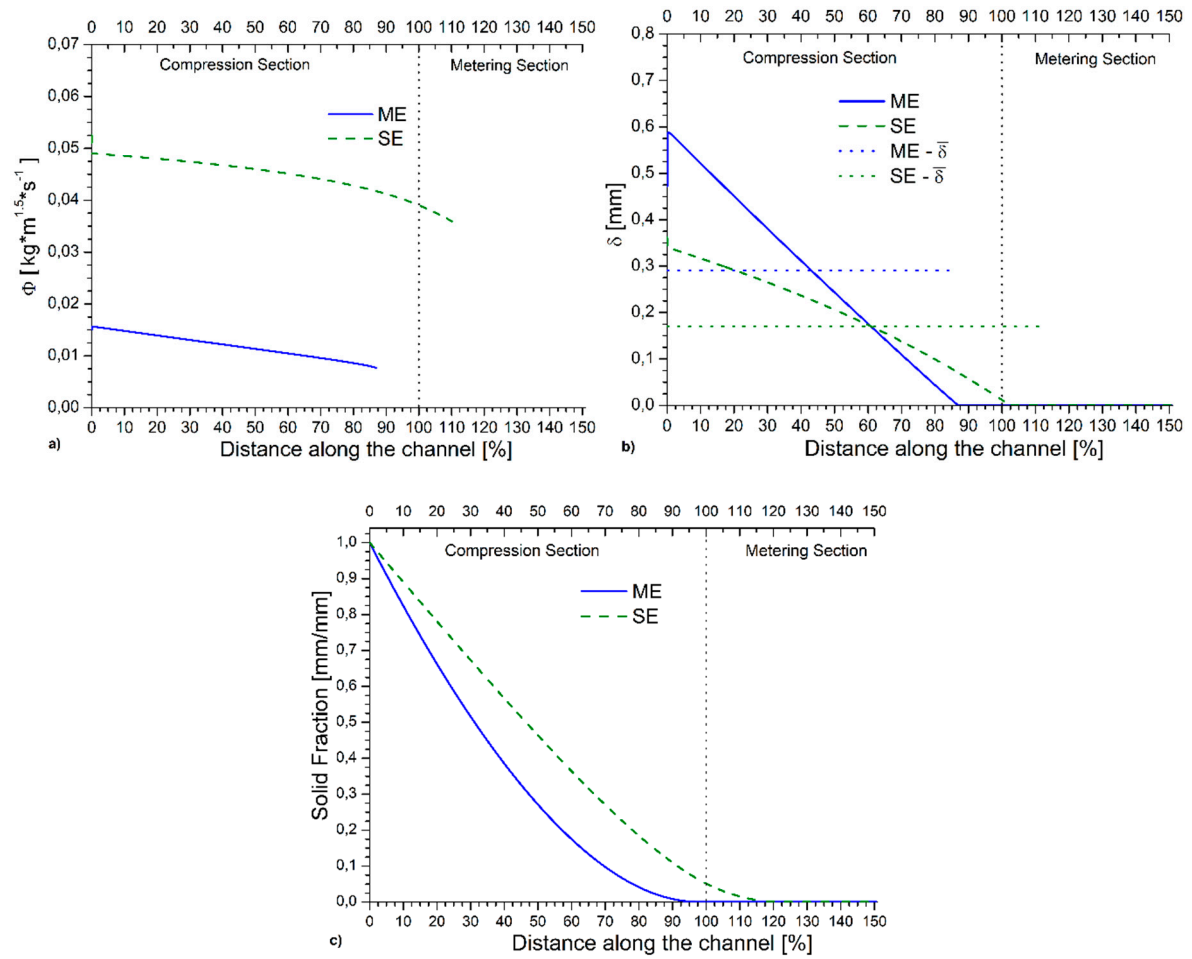

**Figure S1.** Extra information for Figure 6 in the main text regarding (a) melting efficiency parameter  $\phi$ ; (b) melt film layer thickness  $\delta$ ; (c) solid bed profile; in (b) also the overall average melt layer thickness ( $\bar{\delta}$ ) is provided as horizontal lines.

## Compression ratio

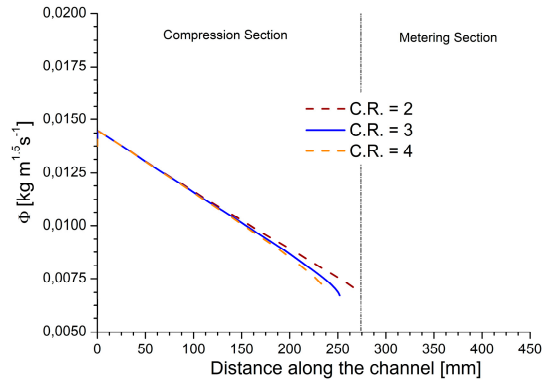

Figure S2. Variation of melting efficiency parameter  $\phi$  as extra information for Figure 9.

## Pitch Angle

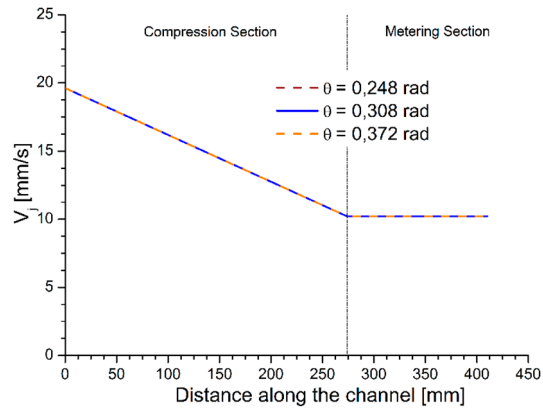

Figure S3. Relative velocity for different values of the pitch angle; extra for Figure 10 in the main text

## Volumetric Inlet:

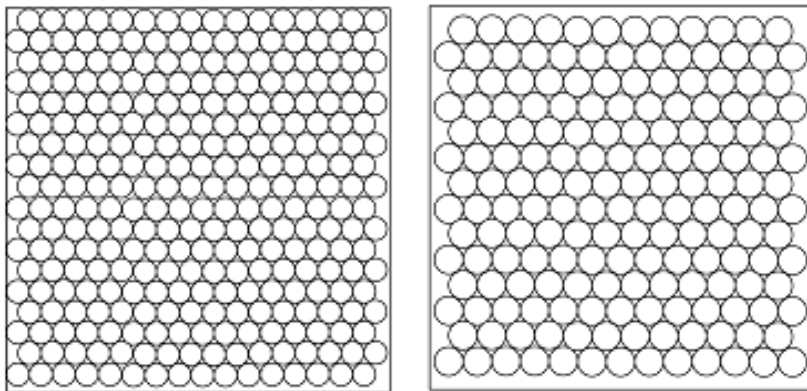

Figure S4. Difference in the polymer (pellets) to channel volume ratio going from 2.4 mm (left, 81% filled) to 3 mm radius (right 74% filled).

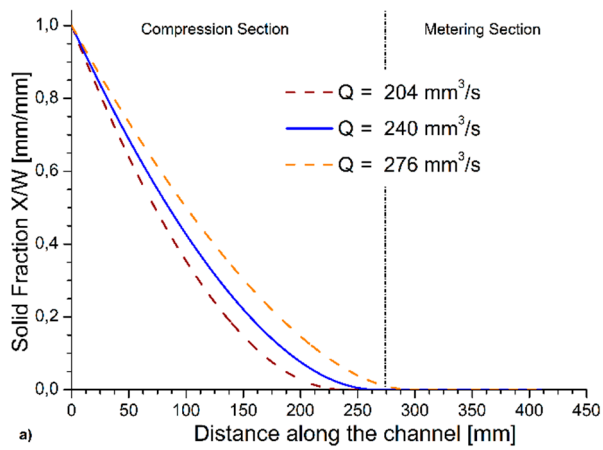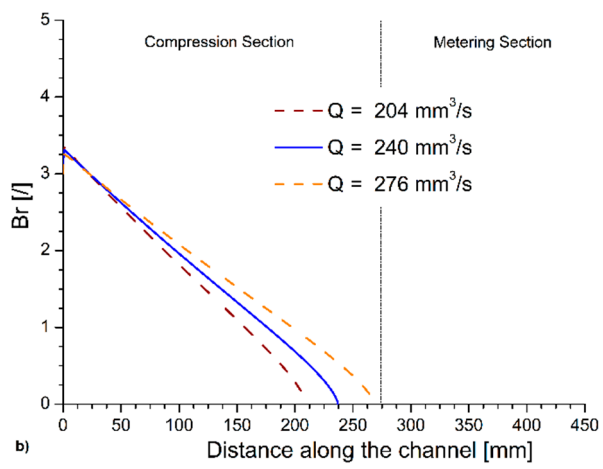

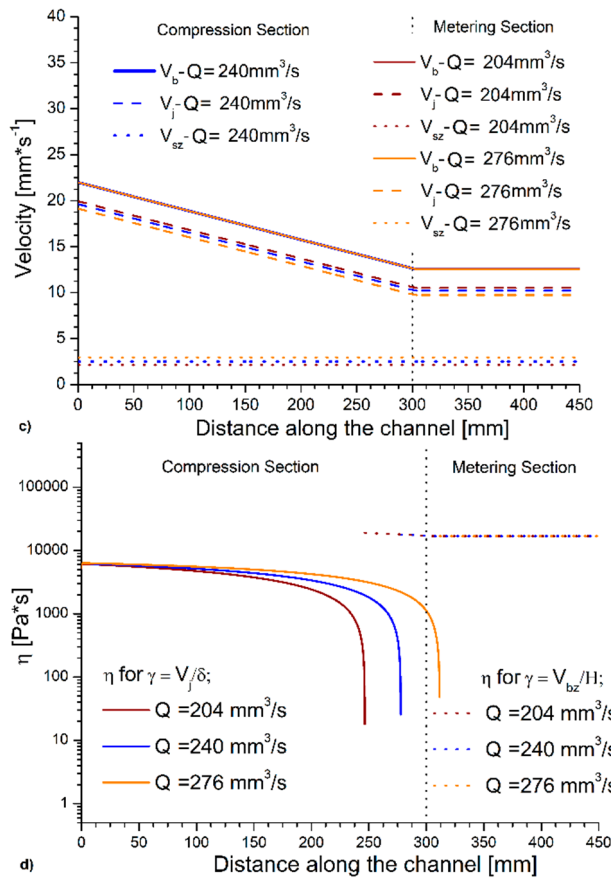

**Figure S5.** a) Melting profile for different volumetric inlets; b) Brinkman number for different volumetric inlets. Other parameters, as in Tables 1 and 2; c) Associated velocity variations; d) associated viscosity variation; Blue lines are reference lines

### Channel Width

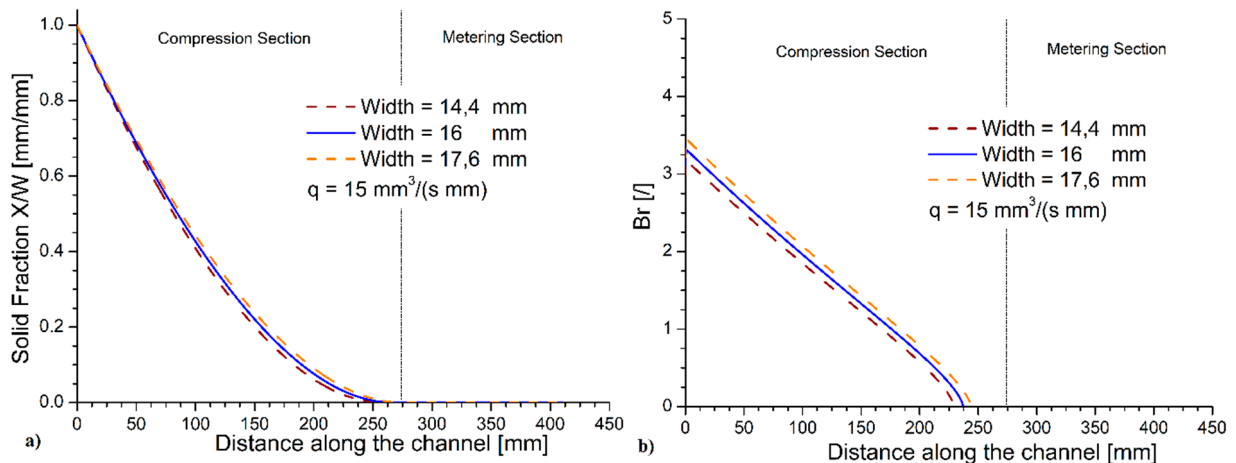

**Figure S6.** a) Melting profile for different values of the channel width; b) Brinkman number for different values of the channel width; Other parameters as in Tables 1 and 2.

### Thermal conductivity

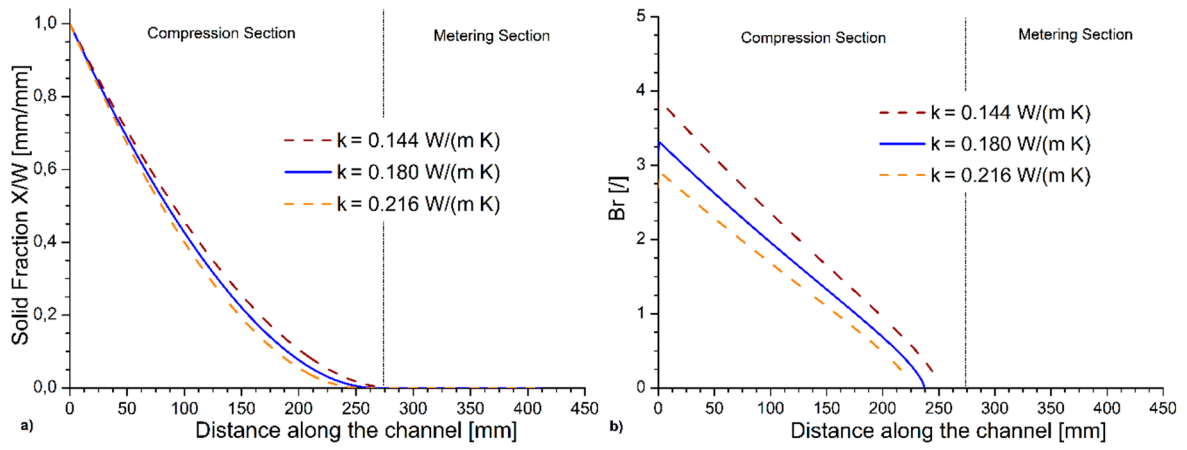

**Figure S7.** a) Melting profile for different values of the thermal conductivity; b) Brinkman number for different values of the thermal conductivity; Other parameters as in Table 1 and 2; blue line reference case.

**Power law**

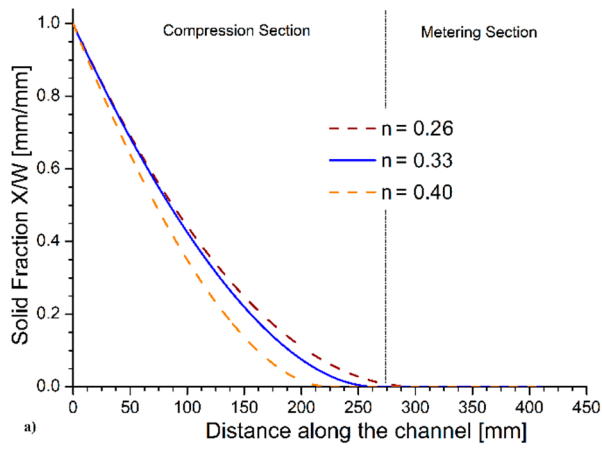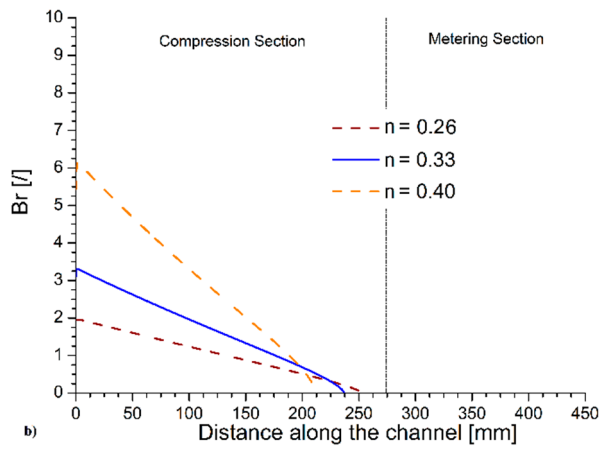

**Figure S8.** a) Melting profile for different Power-law indices; b) Brinkman number for different Power-law indices; Other parameters as in Tables 1 and 2; blue lines are reference case
